# Supplementary material for: Astrocytes detect and upregulate transmission at inhibitory synapses of somatostatin interneurons onto pyramidal cells
Source: PubMed Central journal article supplement (PMC6185912; doi:10.1038/s41467-018-06731-y), 2018-10-12
Supplement: 41467_2018_6731_MOESM1_ESM.pdf [file 41467_2018_6731_MOESM1_ESM.pdf]

**Supplementary information**

**Astrocytes detect and upregulate transmission at inhibitory synapses of  
somatostatin interneurons onto pyramidal cells**

**Matos et al.**

Matos et al. Supplementary Figure 1

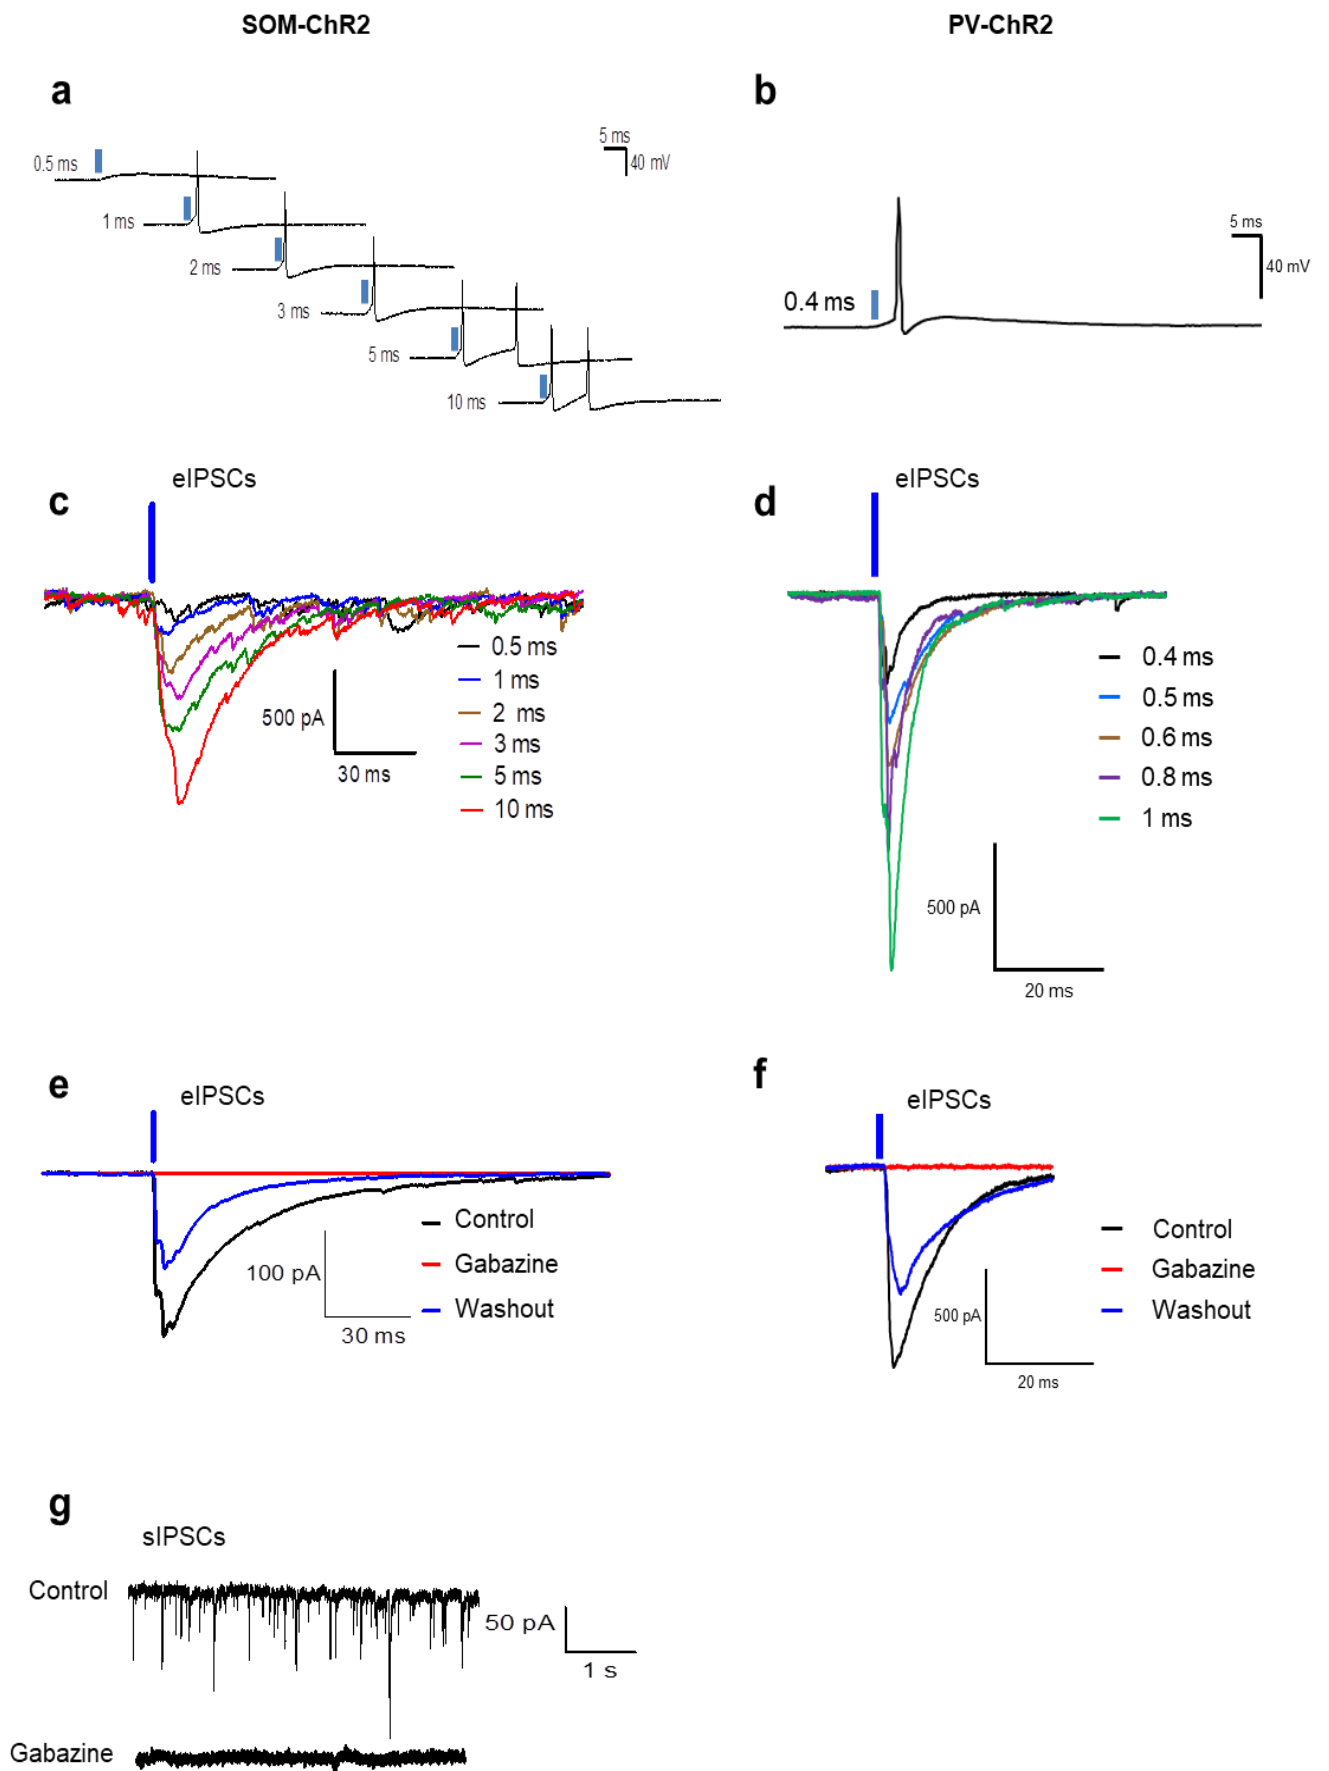

**Supplementary Figure 1. Activation of SOM-INs or PV-INs, and inhibition of pyramidal cells, by optogenetic stimulation in SOM-ChR2/EYFP or PV-ChR2/EYFP mice respectively.** **a** Representative depolarizing responses and action potential firing evoked in a SOM-IN by optogenetic stimulation with blue light (pulse duration 0.5-10 ms; 0.1 Hz) during whole-cell current-clamp recordings of YFP-expressing SOM-INs (n = 4) in slices from SOM-ChR2/EYFP mice. **b** Representative trace with depolarization and action potential firing evoked in a PV-IN by optogenetic stimulation with blue light (0.4ms pulse; 0.1 Hz) during whole-cell current-clamp recording of YFP-expressing PV-INs in slice from PV-ChR2/EYFP mice. **c** SOM-IPSCs from a representative pyramidal cell evoked by the same optogenetic stimulation (0.5-10 ms pulse; 0.1 Hz) of SOM-INs. **d** PV-IPSCs recorded in a representative pyramidal cell evoked by optogenetic stimulation (0.4–1 ms pulse; 0.1 Hz) of PV-INs. **e-f** Traces from representative pyramidal cells showing the reversible block of SOM-IPSCs **e** and PV-IPSCs **f** by the GABA<sub>A</sub>R antagonist Gabazine (5 μM, red trace), confirming the GABA<sub>A</sub>R-mediated inhibition by SOM-INs and PV-INs. **g** Traces from a representative CA1 pyramidal cell showing the block of spontaneous IPSCs (sIPSCs) after 5 min perfusion with Gabazine.

Matos et al. Supplementary Figure 2

**a**

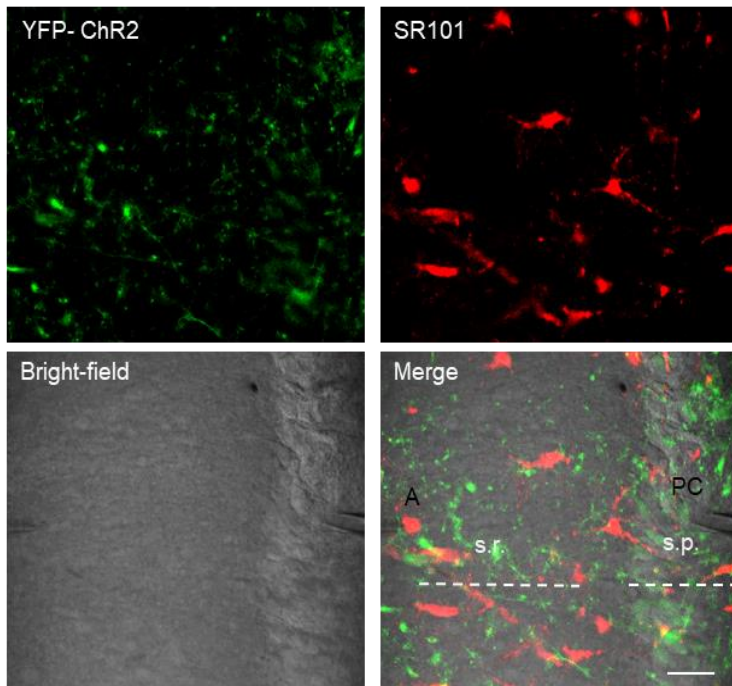

**b**

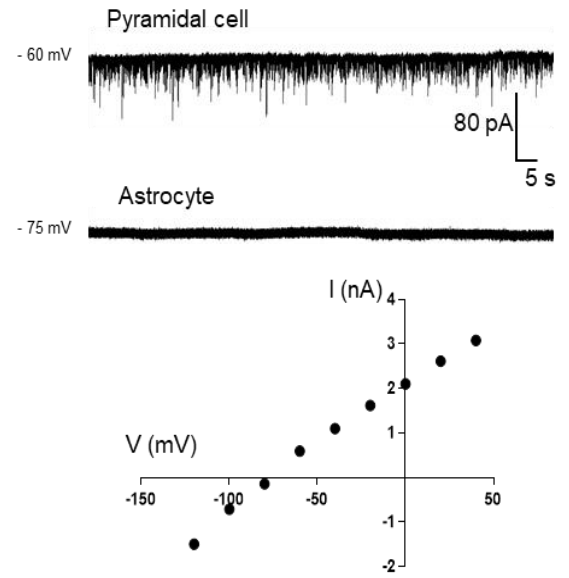

**c**

|         | SOM-eIPSC<br>amplitude<br>(pA ± SEM) | sIPSC<br>amplitude<br>(pA ± SEM) | sIPSC<br>frequency<br>(Hz ± SEM) | sIPSC<br>rise tau<br>(ms ± SEM) | sIPSC<br>decay tau<br>(ms ± SEM) | R <sub>m</sub><br>(MΩ ± SEM) | V <sub>m</sub><br>(mV ± SEM) |
|---------|--------------------------------------|----------------------------------|----------------------------------|---------------------------------|----------------------------------|------------------------------|------------------------------|
| Control | -                                    | 57.47 ± 10.04                    | 11.00 ± 1.04                     | 4.00 ± 2.00                     | 15.02 ± 4.20                     | 192.33 ± 13.30               | 61.04 ± 2.01                 |
| SR101   | 95.10 ± 17.24                        | 52.03 ± 6.07                     | 13.02 ± 3.40                     | 3.48 ± 1.00                     | 14.44 ± 6.20                     | 196.83 ± 44.30               | 60.43 ± 1.03                 |
| P value | > 0.05                               | > 0.05                           | > 0.05                           | > 0.05                          | > 0.05                           | > 0.05                       | > 0.05                       |

**Supplementary Figure 2. Identification of astrocytes with SR101 and lack of effect on pyramidal cell spontaneous IPSCs and membrane properties.** **a** Representative images of CA1 *stratum radiatum* and *pyramidale*, depicting astrocytes labelled by SR101 (250 nM; red), processes of YFP-positive SOM-INs (green) and cells in bright-field. Images show two simultaneous whole-cell recordings obtained from an astrocyte (A in merged image) and a pyramidal cell (PC in merged image). Scale bar 10 μm. **b** Representative dual voltage-clamp recordings of a pyramidal cell and an SR101-labelled astrocyte, illustrating the numerous fast GABA<sub>A</sub>R-dependent spontaneous IPSCs in the pyramidal cell (upper trace) and the absence of synaptic currents in the astrocyte (lower trace). Below, I-V plot from a hippocampal astrocyte, indicating a linear current-voltage relationship in response to current injections. **c** Summary table of pyramidal cell IPSCs properties, as well as membrane resistance (R<sub>m</sub>) and membrane potential (V<sub>m</sub>), showing no effect of application of SR101 dye (n = 10) (unpaired

two-sample Student T-test). A: astrocyte; PC: pyramidal cell; s.p.: *stratum pyramidale*; s.r.: *stratum radiatum*.

### Matos et alSupplementary Figure 3

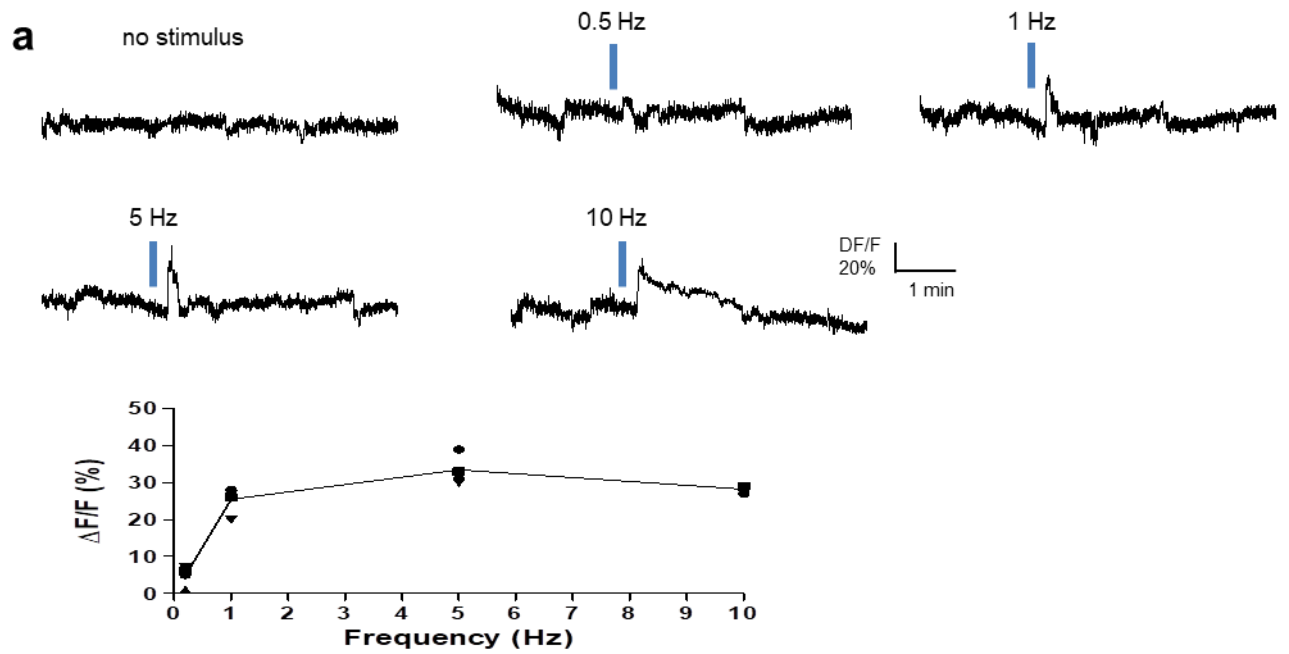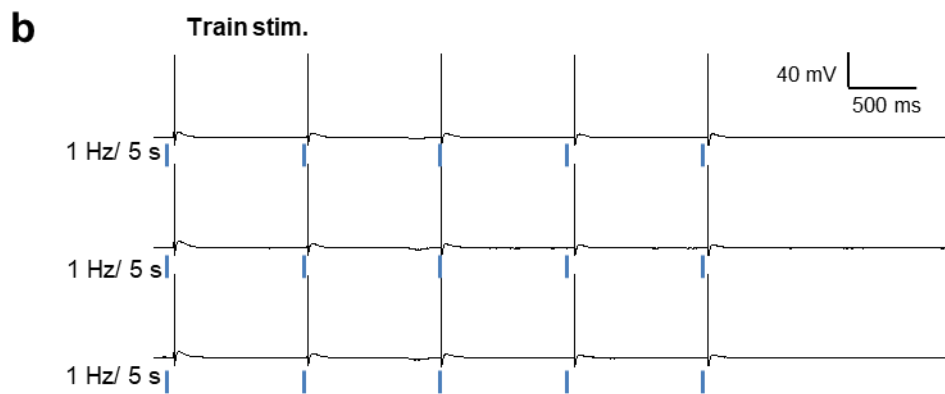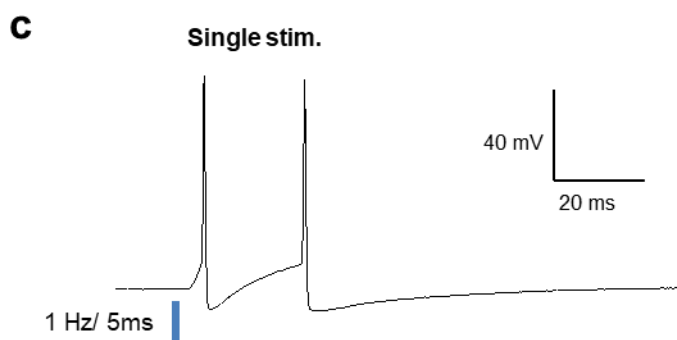

**Supplementary Figure 3. Optogenetic stimulation protocols and action potential firing in SOM-INs to evoke  $\text{Ca}^{2+}$  signals in astrocytes.** **a** Top: Representative  $\text{Ca}^{2+}$  responses from an astrocyte process evoked by different optogenetic stimulation protocols (5ms pulses at 0-10 Hz for 5 s), showing that 1 Hz protocol was sufficient to elicit large  $\text{Ca}^{2+}$  responses. Bottom: Graph depicting the  $\text{Ca}^{2+}$  transients amplitude as a function of optogenetic stimulation frequency ( $n = 3$ ). **b** Representative whole-cell current-clamp recordings of SOM-INs, showing the action potential firing evoked in SOM-INs by the optogenetic train stimulation (5ms pulses at 1Hz for 5 sec) used for inducing  $\text{Ca}^{2+}$  signals in astrocytes ( $n = 4$ ). **c** Representative whole-cell current-clamp recording of SOM-INs, showing the depolarizing response evoked in SOM-INs by optogenetic single stimulation (single 5ms pulse at 1Hz).

**Matos et al. Supplementary Figure 4**

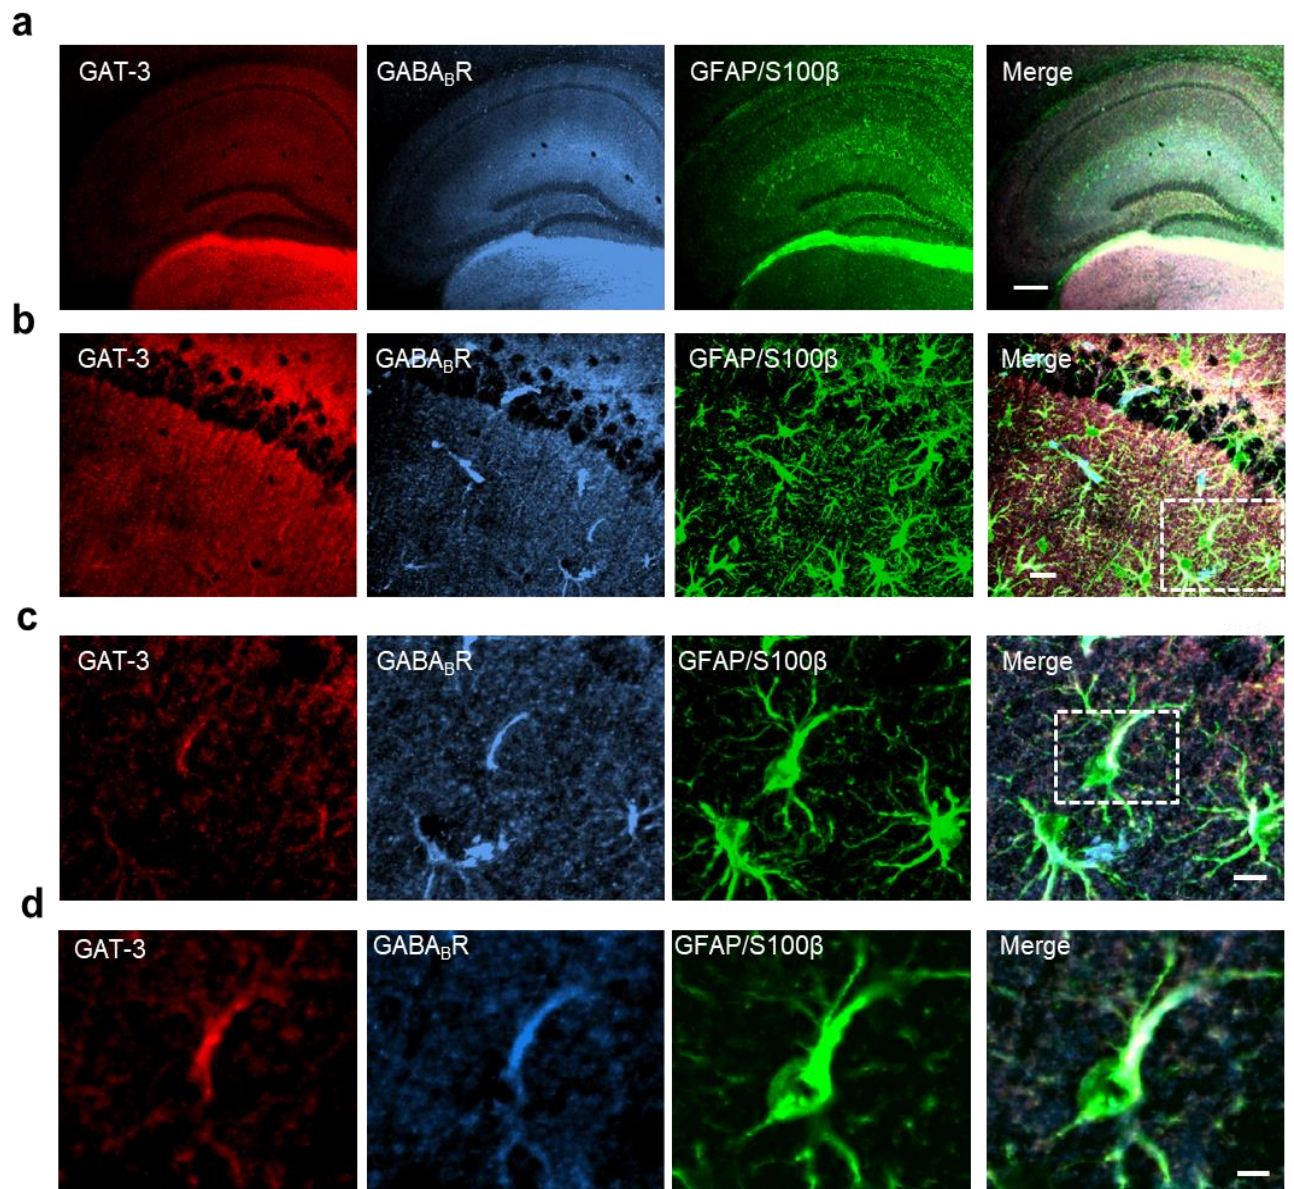

**Supplementary Figure 4. GAT-3 and GABA<sub>B</sub>R co-localize in astrocytic processes. a** Low-magnification immunofluorescence images, depicting hippocampal immunolabelling for GAT-3 (red), GABA<sub>B</sub>R (blue) and astrocyte-specific GFAP/S100 $\beta$  (green), with the merged images at right. Scale bar 100  $\mu$ m **b-c** Representative z-stack images at higher magnification from *stratum pyramidale* and *radiatum* regions, showing GABA<sub>B</sub>R (blue) and GAT-3 (red) staining co-localized in the GFAP/S100 $\beta$ -immunoreactive astrocytic processes (green). Boxed region in **b** corresponds to high-magnification images in **c**. Scale bars 20  $\mu$ m (**b**), 10  $\mu$ m (**c**). **d** Different example of high-magnification image in *stratum radiatum* showing GFAP/S100 $\beta$ -immunoreactive astrocytic processes (green) with co-localized GABA<sub>B</sub>R (blue) and GAT-3 (red) staining. Scale bar 5  $\mu$ m.

| Figure | Panel | Sample size                                       | p value                                                                                 | Test                                |
|--------|-------|---------------------------------------------------|-----------------------------------------------------------------------------------------|-------------------------------------|
| 1      | h     | Vehicle n = 8                                     | p < 0,01                                                                                | One-way ANOVA Tukey's post hoc test |
|        |       | DPCCPX n = 8                                      | p < 0,01 vs, control ; p > 0,05 vs, DPCCPX                                              |                                     |
|        | i     | AMP-GP n = 7                                      | p < 0,01                                                                                | Kruskal-Wallis Dunn's post hoc test |
|        |       | DPCCPX + AMP-GP n = 6                             | p < 0,01                                                                                |                                     |
| 2      | e     | BAPTA 0,1 mM n = 8                                | p < 0,001                                                                               | Kruskal-Wallis Dunn's post hoc test |
|        |       | BAPTA 20 mM n = 12                                |                                                                                         |                                     |
| 3      | k     | Vehicle n = 7                                     | p > 0,05                                                                                | One-way ANOVA Tukey's post hoc test |
|        |       | SNAP-5114 n = 8                                   | p < 0,001                                                                               |                                     |
|        |       | CGP55845 n = 7                                    | p < 0,01 vs, control ; p < 0,05 vs, SNAP-5114                                           |                                     |
|        |       | CGP55845 + SNAP-5114 n = 7                        | p < 0,001 vs, control ; p < 0,01 vs, CGP55845                                           |                                     |
| 4      | d     | Vehicle n = 7                                     | p > 0,05                                                                                | Kruskal-Wallis Dunn's post hoc test |
|        |       | SNAP-5114 n = 6                                   | p < 0,01                                                                                |                                     |
|        |       | CGP55845 n = 7                                    | p > 0,05                                                                                |                                     |
|        | h     | BAPTA n = 8                                       | p < 0,001                                                                               | One-way ANOVA Dunn's post hoc test  |
|        |       | BAPTA + (S)-SNAP-5114 n = 8                       | p < 0,001 ; p > 0,05 vs, BAPTA                                                          |                                     |
| 5      | c     | (S)-SNAP-5114 n = 6                               | p < 0,001                                                                               | One-way ANOVA Tukey's post hoc test |
|        |       | (S)-SNAP-5114 + DPCCPX n = 6                      | p < 0,001 ; p > 0,05 vs, (S)-SNAP-5114                                                  |                                     |
|        |       | (S)-SNAP-5114 n = 4                               | p > 0,05 vs, (S)-SNAP-5114 + N <sup>6</sup> CPA + DPCCPX                                |                                     |
|        |       | (S)-SNAP-5114 + N <sup>6</sup> CPA n = 4          | p < 0,001 vs, (S)-SNAP-5114 ; p < 0,001 vs, (S)-SNAP-5114 + N <sup>6</sup> CPA + DPCCPX |                                     |
|        | d     | (S)-SNAP-5114 + N <sup>6</sup> CPA + DPCCPX n = 4 | p > 0,05 vs, (S)-SNAP-5114 + N <sup>6</sup> CPA                                         | Friedman test Dunn's post hoc test  |
|        |       |                                                   |                                                                                         |                                     |
|        | f     | Vehicle n = 5                                     | p > 0,05                                                                                | Wilcoxon signed-rank test           |
|        |       | N <sup>6</sup> CPA n = 5                          | p > 0,05                                                                                |                                     |
| 6      | f     | Vehicle n = 7                                     | p > 0,05                                                                                | Friedman test Dunn's post hoc test  |
|        |       | DPCCPX n = 7                                      | p > 0,05                                                                                |                                     |
|        |       | SNAP-5114 n = 6                                   | p > 0,05                                                                                |                                     |
| 7      | c     | DPCCPX n = 7                                      | sIPSC Amp p < 0,05 vs, control                                                          | One-way ANOVA Tukey's post hoc test |
|        |       | AMP-GP n = 7 (each)                               |                                                                                         |                                     |
|        | f     | (S)-SNAP-5114 n = 7                               | sIPSC Amp p < 0,01 vs, control                                                          | One-way ANOVA Tukey's post hoc test |
|        |       |                                                   | sIPSC Freq p < 0,05 vs, control                                                         |                                     |
|        | i     | 20 min post-BAPTA n = 6                           | sIPSC Amp p < 0,001 vs, control                                                         | One-way ANOVA Tukey's post hoc test |
|        |       | (S)-SNAP-5114 n = 6                               | sIPSC Freq p < 0,001 vs, control                                                        |                                     |
|        | I     |                                                   | sIPSC Freq p < 0,05 vs, control                                                         |                                     |

**Supplementary Table 1.** Statistical analyses.
